# Supplementary material for: Cardiopulmonary Exercise Testing in Childhood in Late Preterms: Comparison to Early Preterms and Term-Born Controls
Source: MDPI journal article supplement (doi:10.3390/jpm12101547), 2022-09-20
Supplement: s1 [file s1]

Table S1: Demographic, anthropometric and lung function data (Late preterms, early preterms with/without BPD, Healthy term-born controls)

|                                                  | GA= 34-36.6w<br>(late preterm)<br>n=21<br><b>1</b> | GA≤30w<br>without BPD<br>n=23<br><b>2</b> | GA≤30w with<br>BPD<br>n=15<br><b>3</b> | Healthy control<br>born at term<br>n=25<br><b>4</b> | p-value *                                                                    |
|--------------------------------------------------|----------------------------------------------------|-------------------------------------------|----------------------------------------|-----------------------------------------------------|------------------------------------------------------------------------------|
| Age (years)                                      | 9.94±0.87                                          | 9.62±1.35                                 | 9.64±0.97                              | 8.84±0.93                                           | P <sup>3</sup> <0.001<br>P <sup>5</sup> =0.004<br>P <sup>6</sup> =0.031      |
| Male (%)                                         | 12 (57%)                                           | 11 (48%)                                  | 8 (53%)                                | 13 (52%)                                            | P=0.94                                                                       |
| Gestational Age<br>(weeks)                       | 34.9±1.0                                           | 28.8±1.0                                  | 27.9±1.3                               | 39.5±1.4                                            | p <sup>1,2,3,5,6</sup> <0.001                                                |
| Birth Weight (gr)                                | 2373±473                                           | 1171±248                                  | 1003±304                               | 3315±469                                            | p <sup>1,2,5,6</sup> <0.001<br>P <sup>3</sup> =0.009                         |
| Oxygen<br>Supplementation<br>(days) median 25-75 | 0 [0-1]                                            | 14 [3.5-35]                               | 70 [60-84]                             | 0 [0-0]                                             | P <sup>3</sup> =0.30<br>P <sup>4</sup> =0.011<br>p <sup>1,2,5,6</sup> <0.001 |
| Ventilation (days)<br>median 25-75               | 0[0-0]                                             | 5 [2-16]                                  | 16 [6-30]                              | 0[0-0]                                              | p <sup>1,2,5,6</sup> <0.001<br>P <sup>3</sup> =0.41<br>P <sup>4</sup> =0.056 |
| Height (cm)                                      | 137.4±7.7                                          | 135.0±11.2                                | 133.9±7.2                              | 133.3±6.5                                           | P=0.41                                                                       |
| Weight (kg)                                      | 32.6±6.4                                           | 34.3±15.7                                 | 31.6±7.0                               | 30.9±7.6                                            | P=0.68                                                                       |
| BMI percentiles                                  | 49.5±29.3                                          | 52.8±32.3                                 | 55.0±34.5                              | 55.5±31.5                                           | P=0.93                                                                       |
| BMI z score<br>[median] 25-75                    | 0.12<br>[(-0.84)- (0.73)]                          | 0.05<br>[(-0.8)- (0.88)]                  | 0.41<br>[(-0.84)-(1.00)]               | 0.28<br>[(-0.55)-(1.09)]                            | P=0.90                                                                       |
| FEV <sub>1</sub> (L/Sec)                         | 1.73±0.38                                          | 1.67±0.39                                 | 1.41±0.30                              | 1.65±0.32                                           | P=0.056                                                                      |
| FEV <sub>1</sub> (% predicted)                   | 87.5±16.9                                          | 87.8±12.5                                 | 75.6±14.9                              | 91.0±11.7                                           | P <sup>2</sup> =0.002<br>P <sup>4</sup> =0.02<br>P <sup>6</sup> =0.021       |
| FVC (L)                                          | 2.07±0.40                                          | 1.97±0.43                                 | 1.72±0.37                              | 1.89±0.37                                           | P=0.07                                                                       |
| FVC (% predicted)                                | 94.1±13.6                                          | 91.9±11.6                                 | 84.4±14.3                              | 95.5±12.2                                           | P=0.082                                                                      |

\* P<sup>1</sup>= 1 vs 2      p<sup>2</sup>=1 vs 3      p<sup>3</sup>=1 vs 4      p<sup>4</sup>=2 vs 3      p<sup>5</sup>=2 vs 4      p<sup>6</sup>=3 vs 4

GA - Gestational Age; W – weeks; BPD – bronchopulmonary dysplasia; BMI = body mass index; FEV<sub>1</sub> = forced expiratory volume in the first second; FVC = forced vital capacity

Table S2: CPET parameters (for late preterms, early preterms with/without BPD, healthy term-born controls)

|                                                                                                                                                             | GA= 34-36.6w<br>(late preterm)<br>n=21<br><b>1</b> | GA≤30w<br>without BPD<br>n=23<br><b>2</b> | GA≤30w<br>with BPD<br>n=15<br><b>3</b> | Healthy control<br>born at term<br>n=25<br><b>4</b> | p-value*                                                                |
|-------------------------------------------------------------------------------------------------------------------------------------------------------------|----------------------------------------------------|-------------------------------------------|----------------------------------------|-----------------------------------------------------|-------------------------------------------------------------------------|
| Peak $\dot{V}O_2$ Absolute<br>(ml/min)                                                                                                                      | 1206±248                                           | 1084±320                                  | 1243±378                               | 1380±260                                            | P <sup>3</sup> =0.02<br>P <sup>5</sup> =0.005                           |
| Peak $\dot{V}O_2$ Specific<br>(ml/kg/min)                                                                                                                   | 37.6±6.8                                           | 33.9±10.8                                 | 40.2±11.5                              | 45.2±7.4                                            | P <sup>3</sup> =0.038<br>P <sup>5</sup> <0.001<br>P <sup>6</sup> =0.031 |
| Peak $\dot{V}O_2$ (%Pred)                                                                                                                                   | 90.2±15.1                                          | 85.4±20.8                                 | 97.3±25.5                              | 112.4±16.9                                          | P <sup>3</sup> <0.001<br>P <sup>5</sup> <0.001<br>P <sup>6</sup> =0.016 |
| Peak HR (bpm)                                                                                                                                               | 193.4±7                                            | 189.5±10.2                                | 190.9±11.5                             | 191.8±9.8                                           | P=0.63                                                                  |
| Peak HR (%pred)                                                                                                                                             | 96.1±3.9                                           | 94.2±5.3                                  | 94.7±5.7                               | 95.0±5.0                                            | P=0.63                                                                  |
| VE/VCO <sub>2</sub> Slope                                                                                                                                   | 34.4±5.6                                           | 36.9±6.9                                  | 34.3±5.1                               | 34.4±4.3                                            | P=0.38                                                                  |
| Peak O <sub>2</sub> pulse<br>(%pred)                                                                                                                        | 94.1±15.4                                          | 90.7±21.4                                 | 102.8±24.1                             | 118.8±19.1                                          | P <sup>3,5</sup> <0.001<br>P <sup>6</sup> =0.017                        |
| Peak O <sub>2</sub> pulse<br>(VO <sub>2</sub> /HR)                                                                                                          | 6.2±1.1                                            | 5.7±1.6                                   | 6.5±1.7                                | 7.2±1.4                                             | P <sup>3</sup> =0.031<br>P <sup>5</sup> <0.001                          |
| Sat. O <sub>2</sub> Pre                                                                                                                                     | 98.7±1.05                                          | 99.1±0.90                                 | 98.9±0.96                              | 99.1±1.0                                            | P=0.56                                                                  |
| Sat. O <sub>2</sub> Post                                                                                                                                    | 98.5±1.4                                           | 98.8±1.02                                 | 98.5±1.7                               | 99.1±1.1                                            | P=0.38                                                                  |
| Peak VE (L/min)                                                                                                                                             | 48.8±12.4                                          | 44.0±10.6                                 | 40.0±13.4                              | 47.5±9.3                                            | P=0.10                                                                  |
| BR (L)                                                                                                                                                      | 20.4±11.0                                          | 21.2±13.5                                 | 17.5±13.3                              | 20.6±12.0                                           | P=0.83                                                                  |
| BR (%)                                                                                                                                                      | 28.7±13.5                                          | 30.7±17.1                                 | 29.3±18.8                              | 29.3±12.9                                           | P=0.98                                                                  |
| Breathing limitation                                                                                                                                        |                                                    |                                           |                                        |                                                     |                                                                         |
| Low                                                                                                                                                         | 9 (43%)                                            | 6 (26%)                                   | 5 (33%)                                | 3 (12%)                                             | P <sup>3</sup> =0.02                                                    |
| Within normal                                                                                                                                               | 12 (57%)                                           | 17 (74%)                                  | 10 (67%)                               | 21 (88%)                                            |                                                                         |
| * P <sup>1</sup> = 1 vs 2    p <sup>2</sup> =1 vs 3    p <sup>3</sup> =1 vs 4    p <sup>4</sup> =2 vs 3    p <sup>5</sup> =2 vs 4    p <sup>6</sup> =3 vs 4 |                                                    |                                           |                                        |                                                     |                                                                         |

GA - Gestational Age; W – weeks; BPD – bronchopulmonary dysplasia; Peak VO<sub>2</sub> = oxygen uptake at the peak of exercise; HR - heart rate; VE - minute ventilation; VCO<sub>2</sub> - carbon dioxide production; Sat - Saturation; BR – breathing reserve
